# Supplementary material for: Liver magnetic resonance spectroscopy as an alternative for evaluating Niemann-Pick C disease progression
Source: Royal Society of Chemistry journal article supplement (doi:10.1039/d4ra06781a), 2025-01-01
Supplement: d4ra06781a1.xlsx [file d4ra06781a1.xlsx]

## Sheet: Figure 1
	CN						NPC
5 wks	1.83	1.99	1.86	2.57	1.47	1.84	3.28	2.94	2.12	2.78	2.85	5.28
9 wks	1.58	1.43	2.2	0.49	1.8	2.04	3.18	3.7	3.57	2.58	3.05	3.51

## Sheet: Figure 3
0.7 ppm				0.9 ppm				1,3 ppm				1,6 ppm				1,8 ppm				2 ppm				2,2 ppm				2,8 ppm				3,5 ppm				5,3 ppm
CN 5 wks	CN 9 wks	NPC 5 wks	NPC 9 wks	CN 5 wks	CN 9 wks	NPC 5 wks	NPC 9 wks	CN 5 wks	CN 9 wks	NPC 5 wks	NPC 9 wks	CN 5 wks	CN 9 wks	NPC 5 wks	NPC 9 wks	CN 5 wks	CN 9 wks	NPC 5 wks	NPC 9 wks	CN 5 wks	CN 9 wks	NPC 5 wks	NPC 9 wks	CN 5 wks	CN 9 wks	NPC 5 wks	NPC 9 wks	CN 5 wks	CN 9 wks	NPC 5 wks	NPC 9 wks	CN 5 wks	CN 9 wks	NPC 5 wks	NPC 9 wks	CN 5 wks	CN 9 wks	NPC 5 wks	NPC 9 wks
0.98	0.72	2.27	2.43	13.74	14.25	24.04	24.8	44.85	44.07	33.74	34.65	7.36	7.89	9.36	9.4	0	0	2.44	2.49	7.85	8.18	6.98	6.68	7.01	7.24	5.54	5.66	5.89	5.35	3.6	3.17	3.92	4.34	6.43	5.49	8.41	7.96	5.6	5.21
0.48	0.63	1.55	2.49	15.66	14.47	20.36	25.61	39.75	43.49	37.62	35.31	9.05	7.31	8.04	9.87	0	0	1.79	2.44	9.33	8.42	7.3	5.99	6.81	6.96	6.19	5.54	4.9	5.22	4.39	3.55	7.35	5.85	6.19	3.6	6.67	7.65	6.56	5.6
0.87	0.87	3.18	3.05	15.78	15.46	27.47	29.66	43.54	39.18	33.15	32.46	6.79	9.27	10.09	9.84	0	0	2.64	2.9	8.19	9.74	5.73	5.76	6.66	6.72	4.9	4.92	5.33	4.5	3.43	2.75	5.26	7.19	3.82	3.94	7.59	7.06	5.58	4.72
1.27	0.78	2.97	3.92	13.56	13.89	26.28	31.73	45.13	45.23	32.41	31.05	6.99	7.98	9.92	11.21	0	0	2.86	3.6	8.4	7.69	6.6	4.64	7.06	7.12	5.11	4.5	5.65	5.63	3.48	2.84	3.74	3.35	4.81	1.31	8.19	8.33	5.57	5.22
	0.87	1.06	3.32		13.47	18.17	28.46		45.98	34.1	32.43		6.95	11.7	10.46		0	1.23	3.02		7.53	9.29	5.68		7.24	5.88	5.03		5.87	3.41	2.92		3.4	9.58	3.62	5.51	8.69	5.58	5.08

## Sheet: Figura 4
	NPC 5W					NPC 9W
0.7 ppm (Chol)	2.27	1.55	3.18	2.97	1.06	2.43	2.49	3.05	3.92	3.32
0.9 ppm (Chol+FA)	24.04	20.36	27.47	26.28	18.17	24.8	25.61	29.66	31.73	28.46
1.3 ppm (FA)	33.74	37.62	33.15	32.41	34.1	34.65	35.31	32.46	31.05	32.43
1.6 ppm (Chol+FA)	9.36	8.04	10.09	9.92	11.7	9.4	9.87	9.84	11.21	10.46
1.8 ppm (Chol)	2.44	1.79	2.64	2.86	1.23	2.49	2.44	2.9	3.6	3.02
2.0 ppm (FA)	6.98	7.3	5.73	6.6	9.29	6.68	5.99	5.76	4.64	5.68
2.2 ppm (FA)	5.54	6.19	4.9	5.11	5.88	5.66	5.54	4.92	4.5	5.03
2.8 ppm (FA)	3.6	4.39	3.43	3.48	3.41	3.17	3.55	2.75	2.84	2.92
3.5 ppm (Chol)	6.43	6.19	3.82	4.81	9.58	5.49	3.6	3.94	1.31	3.62
5.3 ppm (FA)	5.6	6.56	5.58	5.57	5.58	5.21	5.6	4.72	5.22	5.08

## Sheet: Figure 5
CN 5 wks	CN 9 wks	NPC 5 wks	NPC 9 wks
2.81379	17.6883	40.7928	48.44
2.90057	18.1702	22.2585	26.5497
0.597549	17.7341	53.1459	30.7559
13.8132	22.1633	46.4994	35.5559
20.022		50.3115	12.7829

## Sheet: Figure 6A
	NPC 5 wks					NPC 9 wks
Palmitic	25.7969	24.3998	25.9816	23.5749	26.7503	27.1985	25.5459	24.2557	22.6222	23.3835
Stearic	16.6612	16.7856	18.0918	17.207	14.1617	15.2017	14.3927	14.6221	15.9445	15.9606
Oleic	9.7347	10.363	8.88576	9.95203	14.3816	16.0387	13.8268	11.7839	12.4817	13.0997
Linoleic	15.1584	17.0954	11.3698	12.168	19.358	10.2622	13.9814	13.6721	13.5994	16.1611
Arachidonic	11.9845	14.2189	15.4143	15.9216	11.501	11.5884	13.4821	12.6149	12.9798	10.6005
DHA	20.6643	17.1372	20.2567	21.1765	13.8474	19.7105	18.7712	23.0513	22.3724	20.7947

## Sheet: Figure 6B
NPC 5 wks	NPC 9 wks
26.8873	21.2008
30.2555	26.6249
27.7048	25.49
28.3422	25.1434
28.9656	26.0165
